# Supplementary material for: Integrated proteome and phosphoproteome analyses of peripheral blood mononuclear cells in primary Sjögren syndrome patients
Source: publisher site journal article supplement (doi:10.18632/aging.202233), 2020-12-03
Supplement: Supplementary file [file aging-v13i1-202233-supplementary-material-SD1.pdf]

SUPPLEMENTARY FIGURES

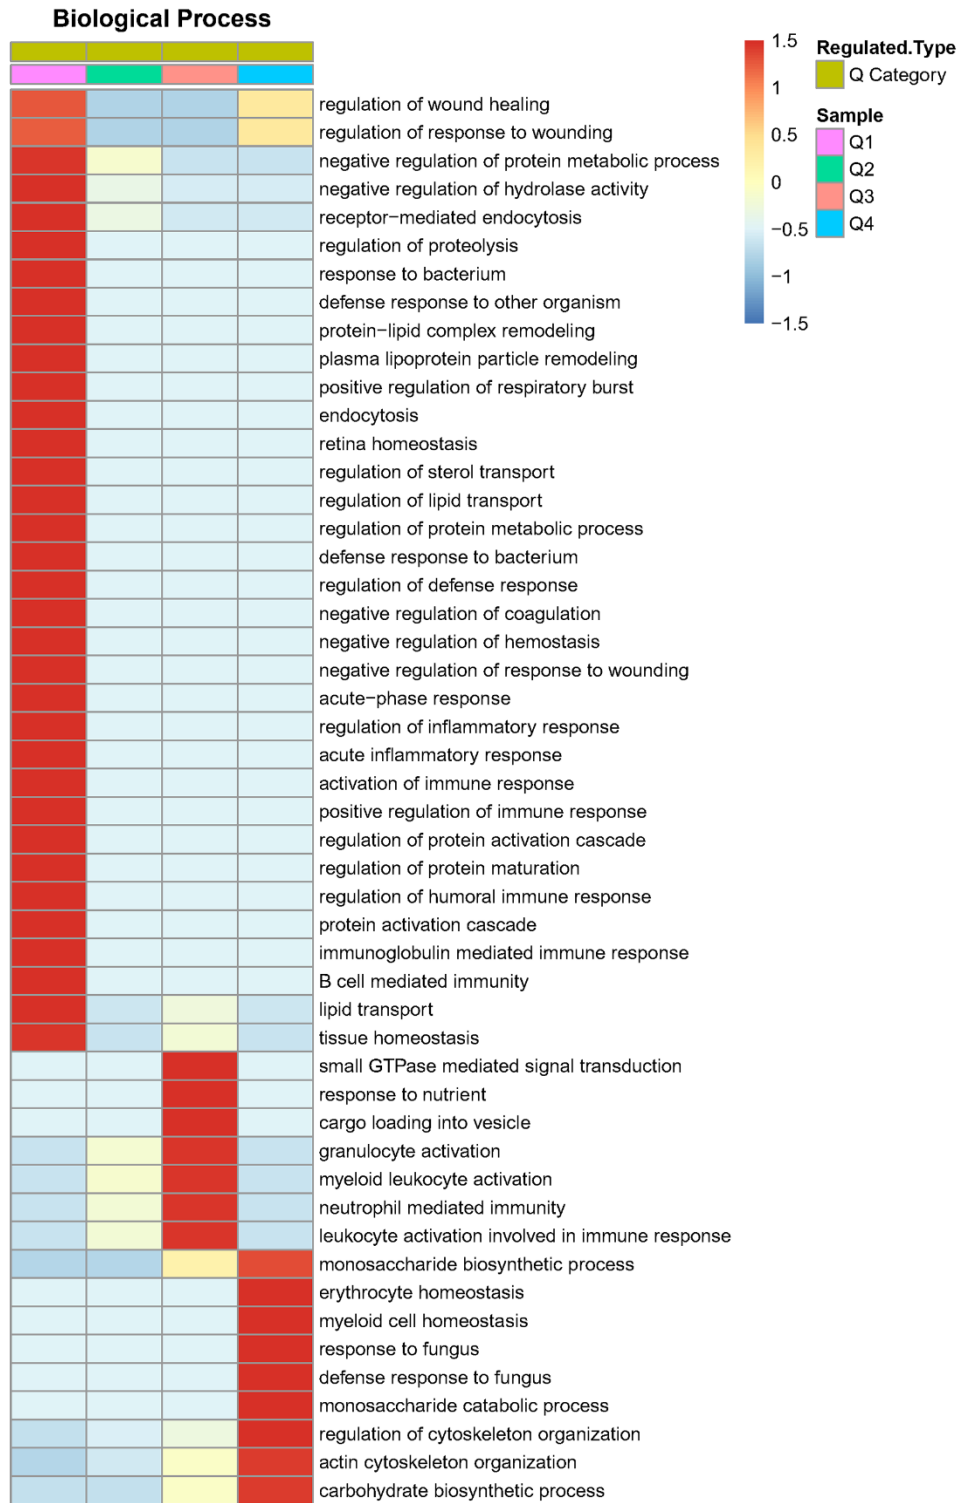

Supplementary Figure 1. Functional enrichment clustering analyses of differentially expressed proteins (DEPs) in four quantiles (Q1-Q4) based on biological process.

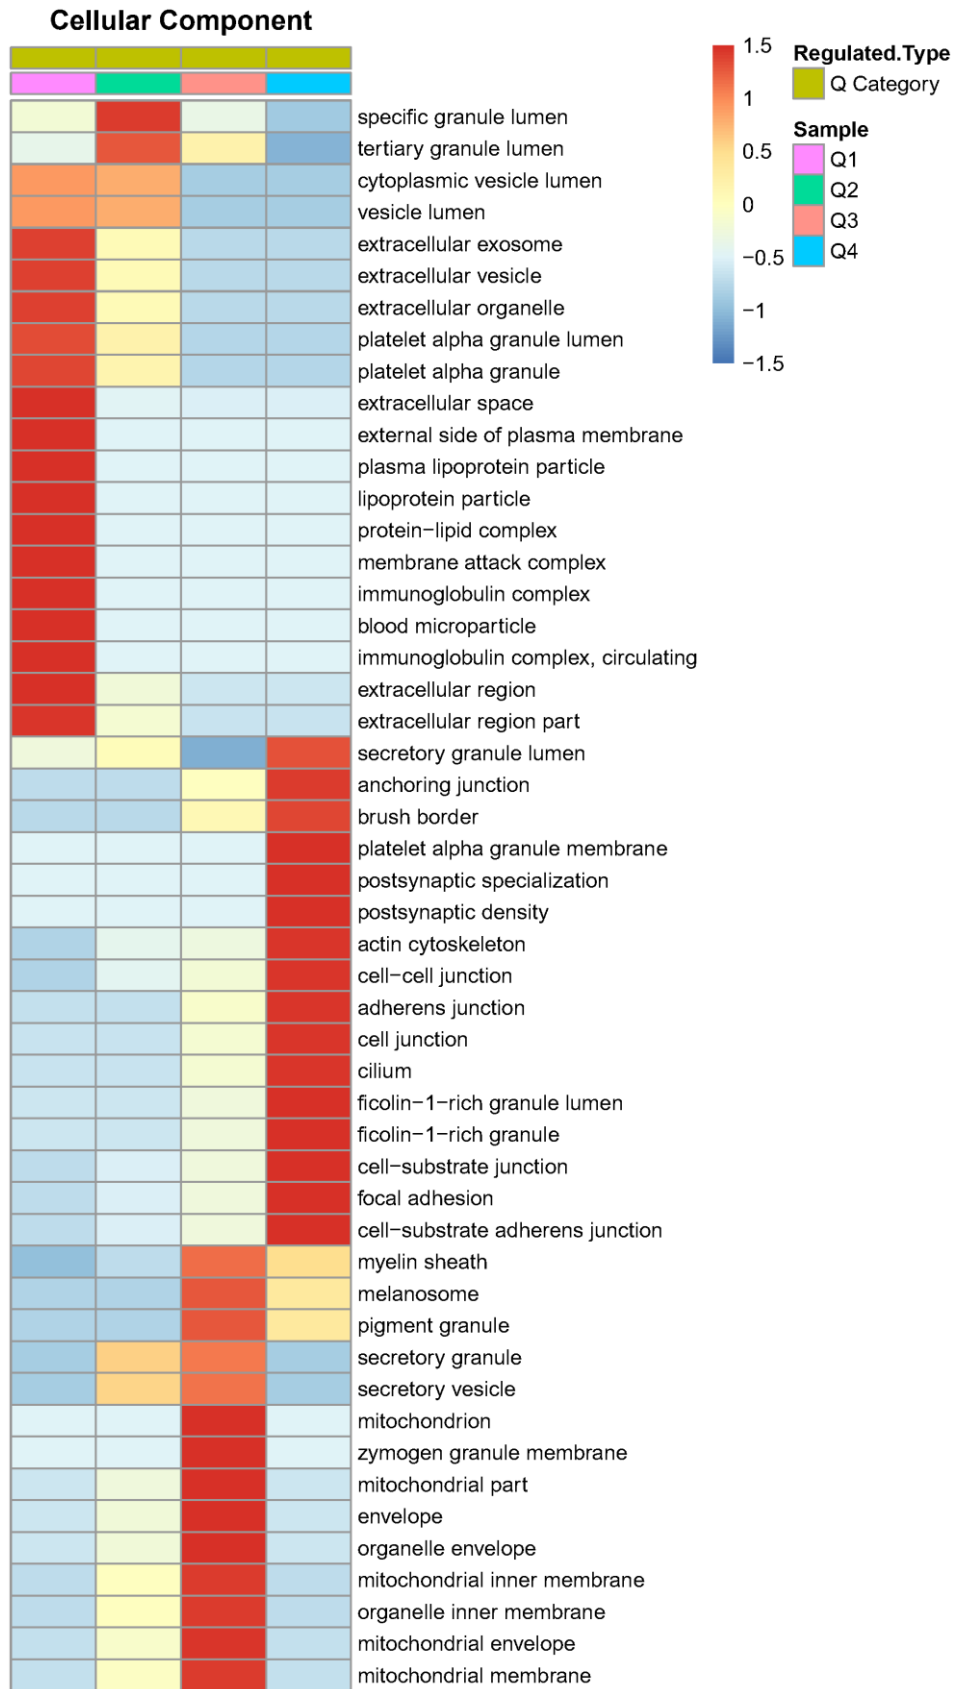

**Supplementary Figure 2. Functional enrichment clustering analyses of differentially expressed proteins (DEPs) in four quantiles (Q1-Q4) based on cellular component.**

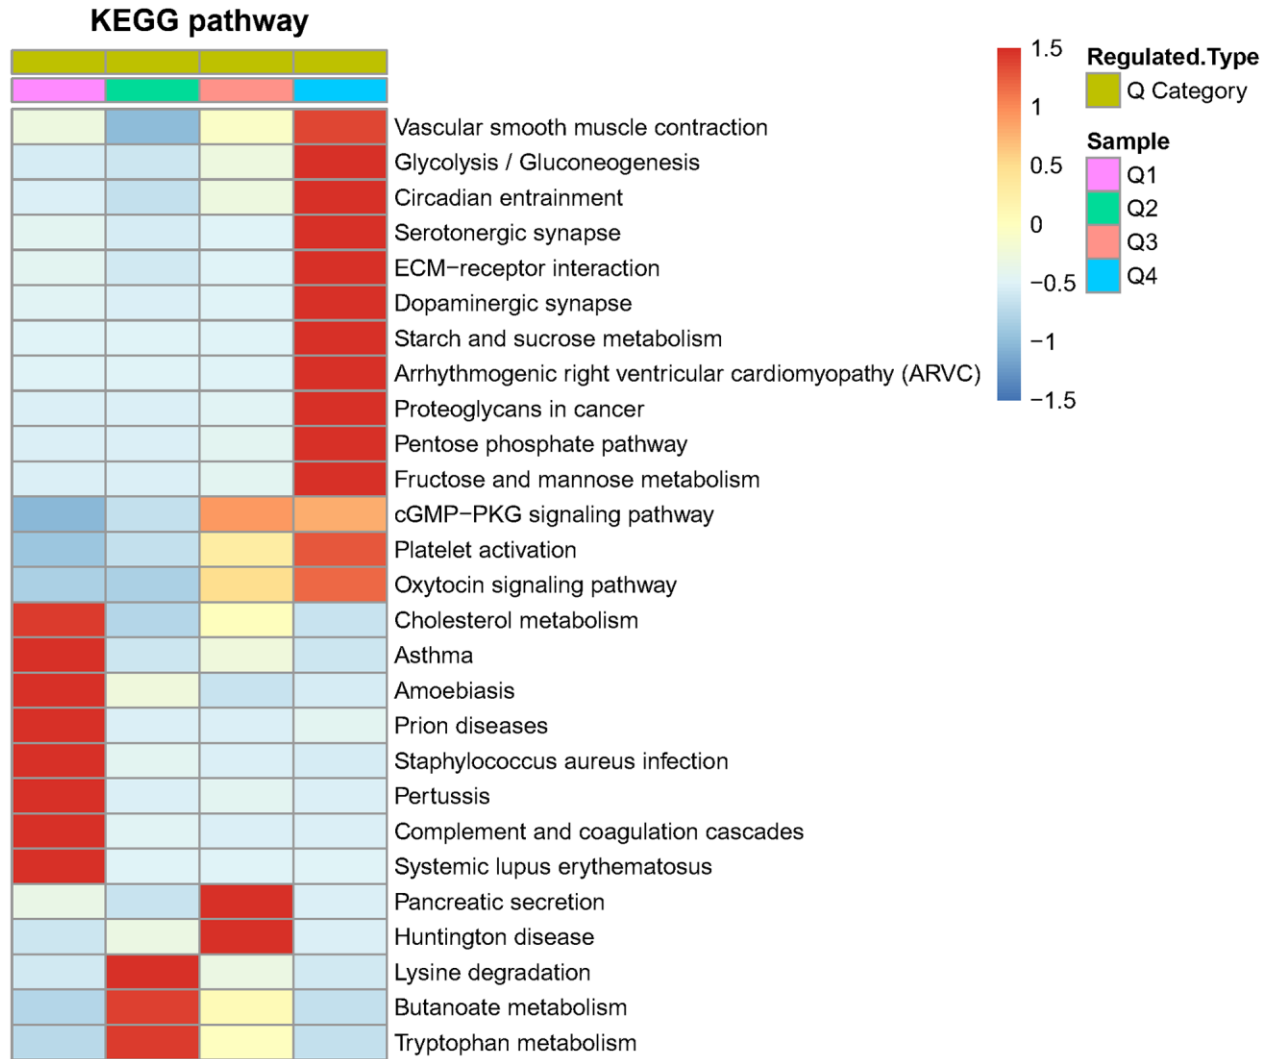

**Supplementary Figure 3. Kyoto Encyclopedia of Genes and Genomes (KEGG) enrichment clustering analyses of differentially expressed proteins (DEPs) in four quantiles (Q1-Q4).**

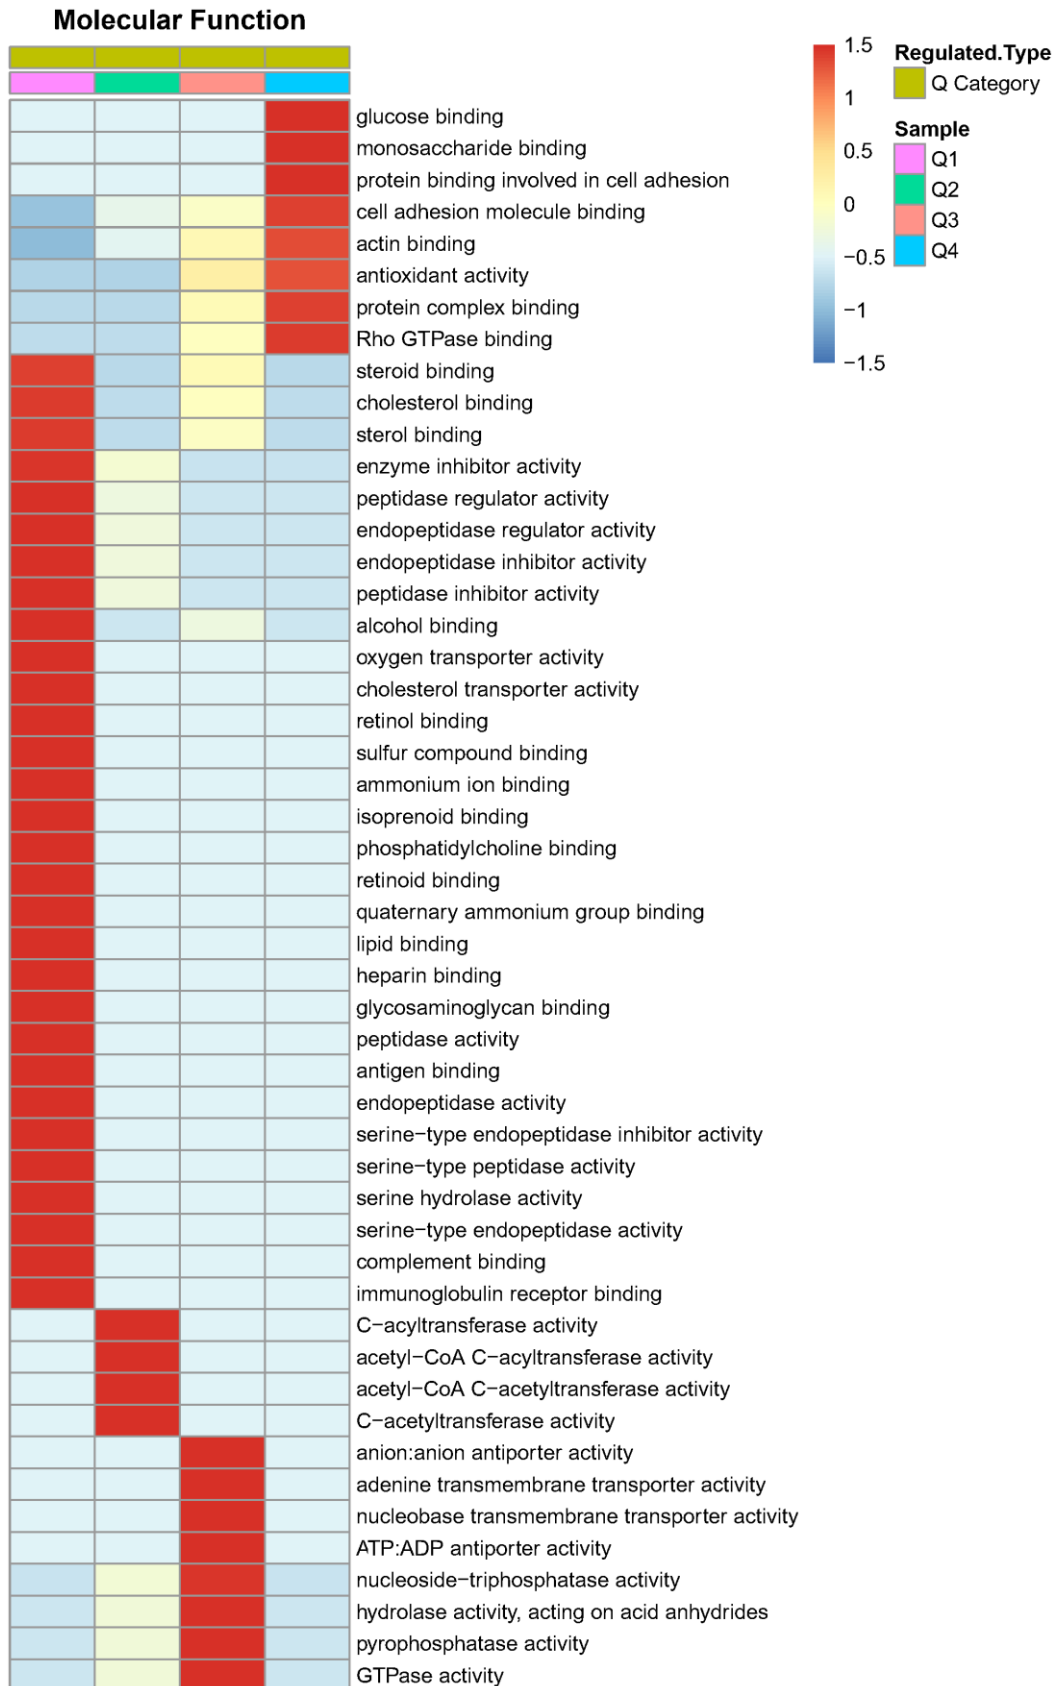

Supplementary Figure 4. Functional enrichment clustering analyses of differentially expressed proteins (DEPs) in four quantiles (Q1-Q4) based on molecular function.

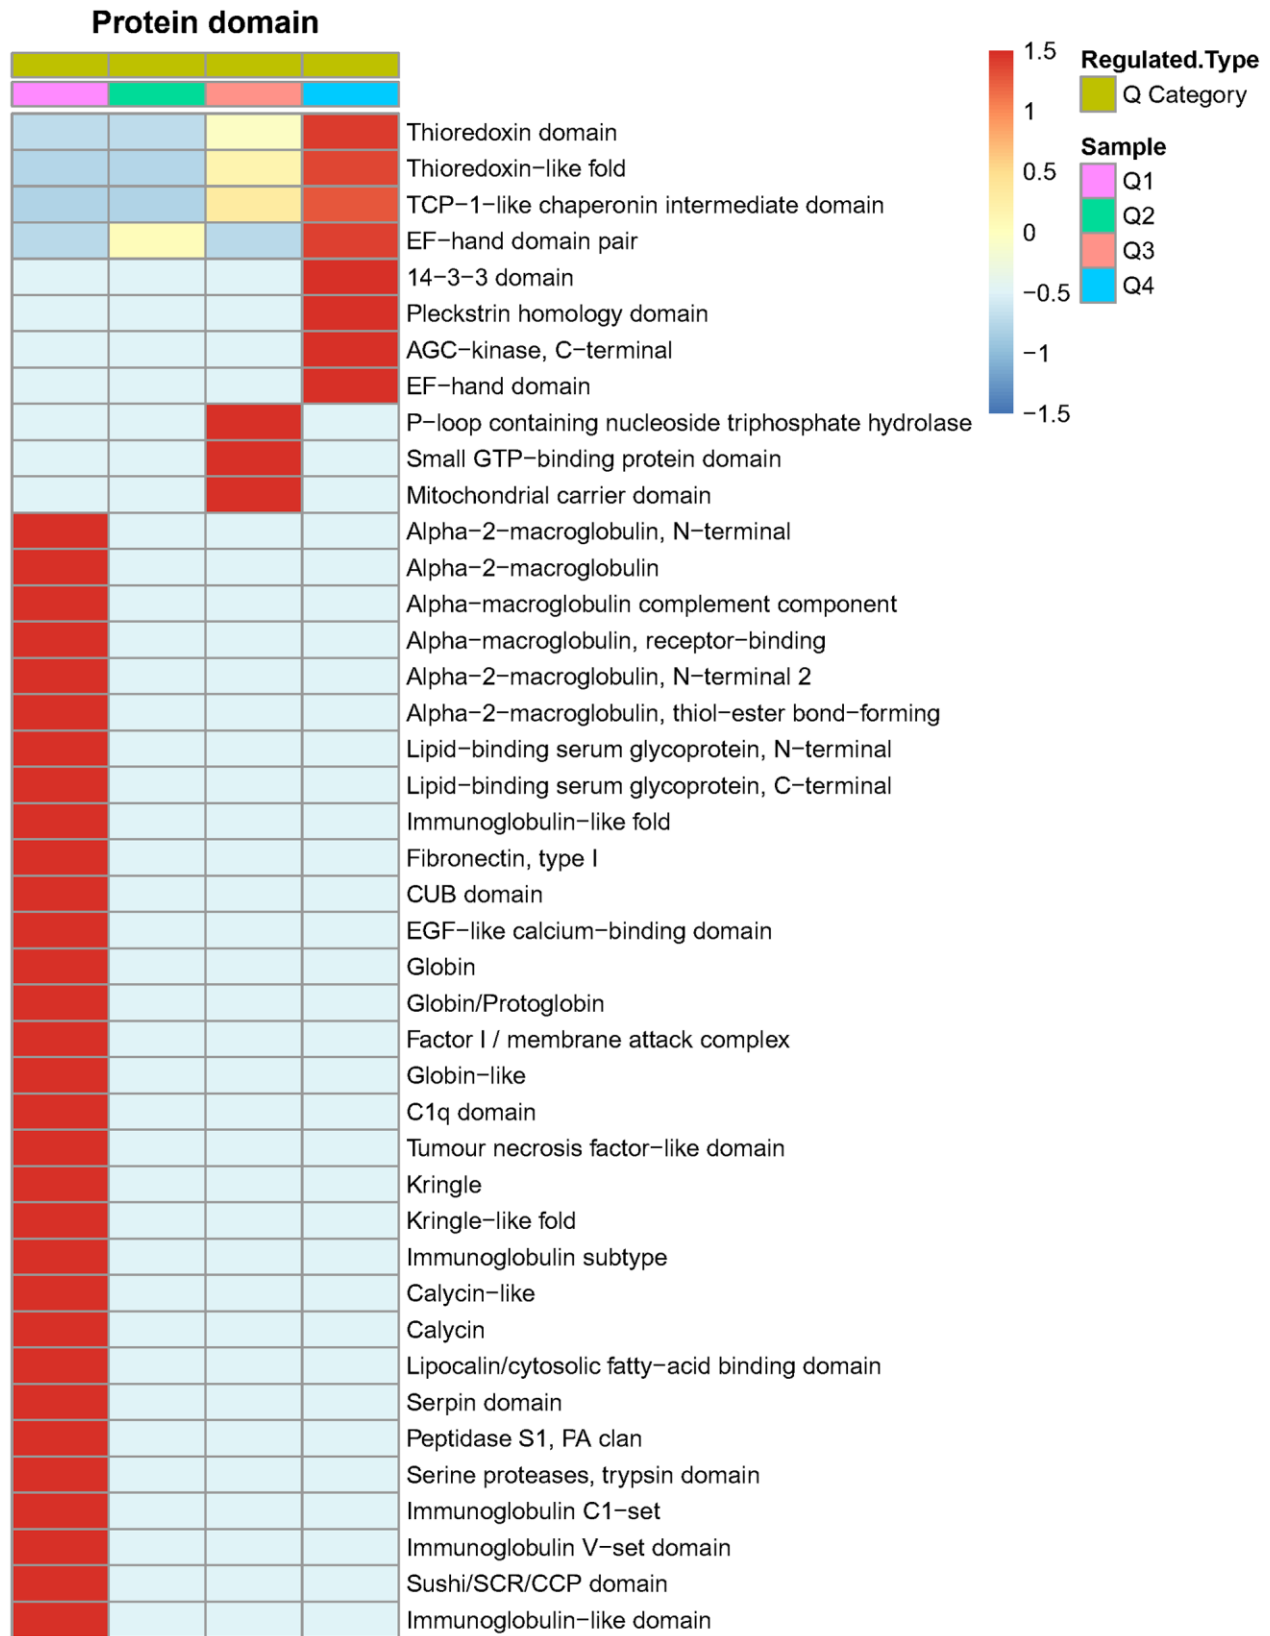

Supplementary Figure 5. Functional enrichment clustering analyses of differentially expressed proteins (DEPs) in four quantiles (Q1-Q4) based on protein domain.

**A**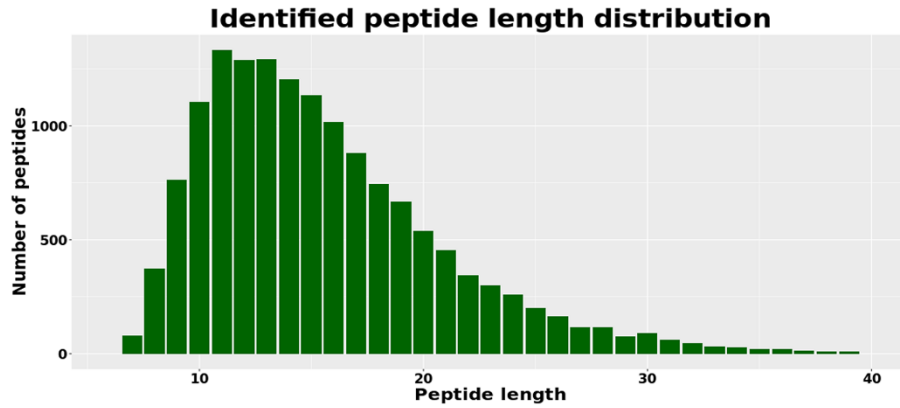**B**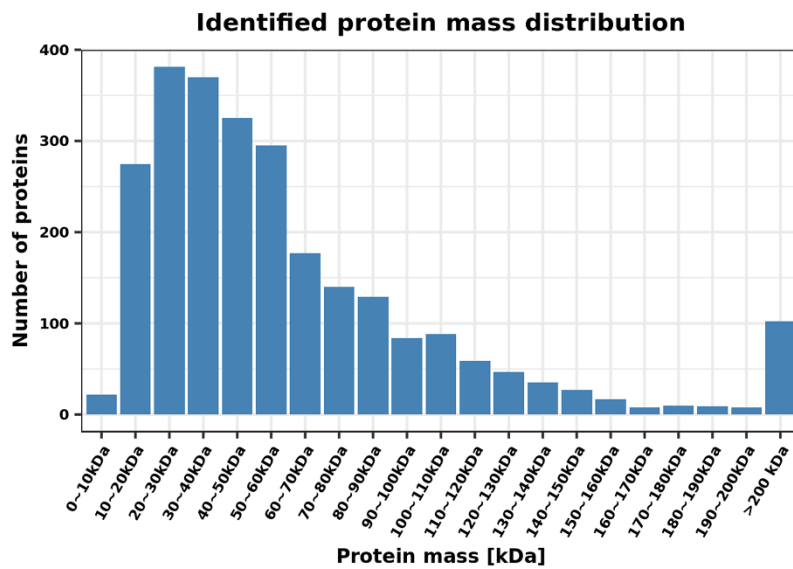**C**

**Protein sequence coverage distribution**

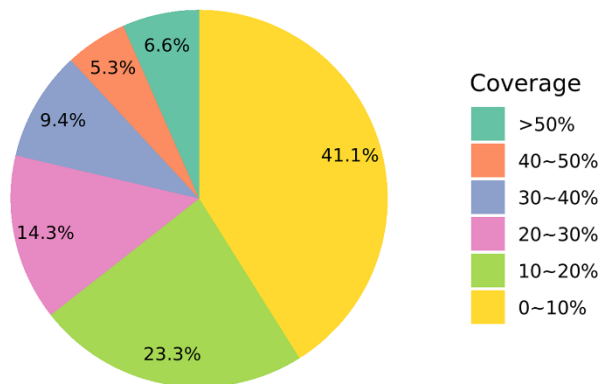

**Supplementary Figure 6.** (A) The length distribution of peptides identified by mass spectrometry. (B) Molecular weight distribution of all identified proteins. (C) Protein sequence coverage distribution.

**A**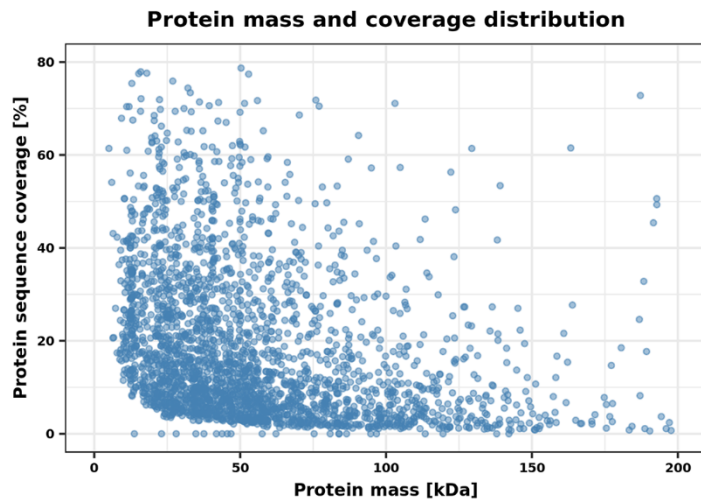**B**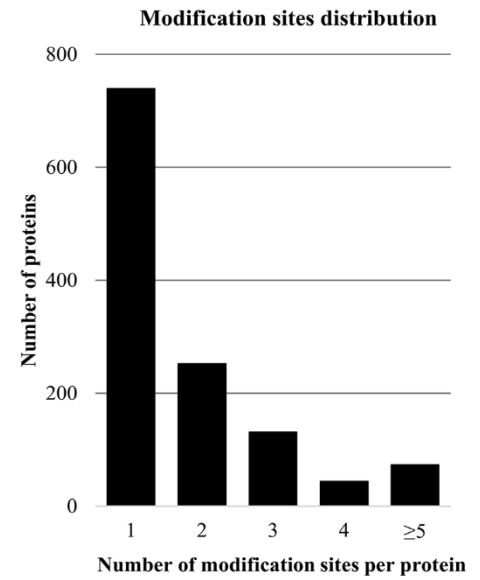

**Supplementary Figure 7.** (A) The relationship between the molecular weight of the protein and the coverage determined by mass spectrometry. (B) The number of modification sites of each corresponding protein.
