# Supplementary material for: Integrated proteome and phosphoproteome analyses of peripheral blood mononuclear cells in primary Sjögren syndrome patients
Source: publisher site journal article supplement (doi:10.18632/aging.202233), 2020-12-03
Supplement: Supplementary file [file aging-v13i1-202233-supplementary-material-SD3.pdf]

## SUPPLEMENTARY TABLES

**Supplementary Table 2. Clinical characteristics of the primary Sjögren's syndrome (pSS) and normal control (NC) subjects.**

|                                        | pSS Age Group (30-65 years old) | NC Age Group (30-65 years old) |
|----------------------------------------|---------------------------------|--------------------------------|
| Number of Subjects                     | 8                               | 10                             |
| Age, mean $\pm$ SD years old           | 46 $\pm$ 6.2                    | 43.2 $\pm$ 6.01                |
| Sex, % female                          | 100%                            | 100%                           |
| Disease duration, mean $\pm$ SD years  | 6.2 $\pm$ 2.7                   | N/A                            |
| % UWSF ( $\leq$ 1.5 ml/15 min)         | 60%                             | 0%                             |
| Mean UWSF (ml/15 min)                  | 1.67 $\pm$ 1.2                  | 3.9 $\pm$ 1.7                  |
| % + Schirmer's test ( $\leq$ 5mm/5min) | 80%                             | 0%                             |
| Mean Schirmer (mm/5min)                | 5.2 $\pm$ 7.9                   | 25.4 $\pm$ 8.08                |
| % anti-SSA antibodies                  | 100%                            | 0%                             |
| % anti-SSB antibodies                  | 80%                             | 0%                             |
| Mean RF                                | 200 $\pm$ 80                    | N/A                            |

Recruitment of pSS subjects was based on strict American European Consensus Group (AECG) criteria. Non-smoking adult pSS female subjects were screened for oral and ocular dryness, positive labial gland biopsy and positive serological tests for SSA and SSB antibodies. Age-matched, non-smoking adult normal control (NC) females were screened for good general and oral health. *UWSF=Unstimulated whole saliva flow; RF=Rheumatoid factor; N/A= Not applicable.*

**Supplementary Table 3. The materials and reagents required for the sample preparation.**

| Materials and reagents             | Supplier        |
|------------------------------------|-----------------|
| protease inhibitor                 | Calbiochem      |
| ultrapure water (H <sub>2</sub> O) | Fisher Chemical |
| acetonitrile                       | Fisher Chemical |
| formic acid                        | Fluka           |
| phosphorylase inhibitor            | Millipore       |
| trypsin                            | Promega         |
| iodoacetamide                      | Sigma           |
| urea                               | Sigma           |
| dithiothreitol                     | Sigma           |
| TEAB                               | Sigma           |
| trifluoroacetic acid               | Sigma-Aldrich   |
| BCA kit                            | Beyotime        |
